# Supplementary material for: Arginine Homopeptide of 11 Residues as a Model of Cell-Penetrating Peptides in the Interaction with Bacterial Membranes
Source: MDPI journal article supplement (doi:10.3390/membranes12121180), 2022-11-24
Supplement: s1 [file s1]

# R11 homopeptide as a model of cell penetrating peptides in the interaction with bacterial membranes

Supplementary material

Table S1. Summary of the main features for Ala scanning peptides.

| Substitution position | Sequence              | Retention time (min) | Molecular mass |          |
|-----------------------|-----------------------|----------------------|----------------|----------|
|                       |                       |                      | Calculated     | Observed |
| <b>R11</b>            | RRRRRRRRRRR           | 4.18                 | 1736.1         | 1736     |
| <b>A1</b>             | <b>A</b> RRRRRRRRRR   | 4.20                 | 1650.99        | 1650     |
| <b>A2</b>             | R <b>A</b> RRRRRRRRR  | 4.41                 | 1650.99        | 1650     |
| <b>A3</b>             | RR <b>A</b> RRRRRRRR  | 4.25                 | 1650.99        | 1650     |
| <b>A4</b>             | RRR <b>A</b> RRRRRRR  | 4.43                 | 1650.99        | 1650     |
| <b>A5</b>             | RRRR <b>A</b> RRRRRR  | 4.21                 | 1650.99        | 1650     |
| <b>A6</b>             | RRRRR <b>A</b> RRRRR  | 4.25                 | 1650.99        | 1650     |
| <b>A7</b>             | RRRRRR <b>A</b> RRRR  | 4.26                 | 1650.99        | 1650     |
| <b>A8</b>             | RRRRRRR <b>A</b> RRR  | 4.23                 | 1650.99        | 1650     |
| <b>A9</b>             | RRRRRRRR <b>A</b> RR  | 4.29                 | 1650.99        | 1650     |
| <b>A10</b>            | RRRRRRRRRR <b>A</b> R | 4.27                 | 1650.99        | 1650     |
| <b>A11</b>            | RRRRRRRRRRR <b>A</b>  | 4.27                 | 1650.99        | 1650     |

Table S2. Summary of the main features for Pro scanning peptides.

| Substitution position | Sequence              | Retention time (min) | Molecular mass |          |
|-----------------------|-----------------------|----------------------|----------------|----------|
|                       |                       |                      | Calculated     | Observed |
| <b>R11</b>            | RRRRRRRRRRR           | 4.18                 | 1736.1         | 1736     |
| <b>P1</b>             | <b>P</b> RRRRRRRRRR   | 4.16                 | 1677.13        | 1676     |
| <b>P2</b>             | R <b>P</b> RRRRRRRRR  | 4.17                 | 1677.13        | 1676     |
| <b>P3</b>             | RR <b>P</b> RRRRRRRR  | 4.14                 | 1677.13        | 1676     |
| <b>P4</b>             | RRR <b>P</b> RRRRRRR  | 4.15                 | 1677.13        | 1676     |
| <b>P5</b>             | RRRR <b>P</b> RRRRRR  | 4.14                 | 1677.13        | 1674     |
| <b>P6</b>             | RRRRR <b>P</b> RRRRR  | 4.13                 | 1677.13        | 1677     |
| <b>P7</b>             | RRRRRR <b>P</b> RRRR  | 4.14                 | 1677.13        | 1677     |
| <b>P8</b>             | RRRRRRR <b>P</b> RRR  | 4.16                 | 1677.13        | 1676     |
| <b>P9</b>             | RRRRRRRR <b>P</b> RR  | 4.19                 | 1677.13        | 1677     |
| <b>P10</b>            | RRRRRRRRRR <b>P</b> R | 4.22                 | 1677.13        | 1676     |
| <b>P11</b>            | RRRRRRRRRRR <b>P</b>  | 4.24                 | 1677.13        | 1676     |

**Table S3.** Summary of the main features for Leu scanning peptides.

| Substitution position | Sequence              | Retention time (min) | Molecular mass |          |
|-----------------------|-----------------------|----------------------|----------------|----------|
|                       |                       |                      | Calculated     | Observed |
| <b>R11</b>            | RRRRRRRRRRR           | 4.18                 | 1736.1         | 1736     |
| <b>L1</b>             | <b>L</b> RRRRRRRRRRR  | 4.27                 | 1693.17        | 1692     |
| <b>L2</b>             | R <b>L</b> RRRRRRRRRR | 4.25                 | 1693.17        | 1692     |
| <b>L3</b>             | RR <b>L</b> RRRRRRRRR | 4.23                 | 1693.17        | 1692     |
| <b>L4</b>             | RRR <b>L</b> RRRRRRRR | 4.18                 | 1693.17        | 1692     |
| <b>L5</b>             | RRRR <b>L</b> RRRRRR  | 4.26                 | 1693.17        | 1692     |
| <b>L6</b>             | RRRRR <b>L</b> RRRRR  | 4.25                 | 1693.17        | 1692     |
| <b>L7</b>             | RRRRRR <b>L</b> RRRR  | 4.23                 | 1693.17        | 1692     |
| <b>L8</b>             | RRRRRRR <b>L</b> RRR  | 4.53                 | 1693.17        | 1692     |
| <b>L9</b>             | RRRRRRRR <b>L</b> RR  | 4.28                 | 1693.17        | 1692     |
| <b>L10</b>            | RRRRRRRRR <b>L</b> R  | 4.34                 | 1693.17        | 1692     |
| <b>L11</b>            | RRRRRRRRRR <b>L</b>   | 4.22                 | 1693.17        | 1692     |

**Table S4.** Summary of the main features for tryptophan scanning peptides.

| Substitution position | Sequence              | Retention time (min) | Molecular mass |          |
|-----------------------|-----------------------|----------------------|----------------|----------|
|                       |                       |                      | Calculated     | Observed |
| <b>R11</b>            | RRRRRRRRRRR           | 4.18                 | 1736.1         | 1736     |
| <b>W1</b>             | <b>W</b> RRRRRRRRRRR  | 4.22                 | 1766.23        | 1764     |
| <b>W2</b>             | R <b>W</b> RRRRRRRRRR | 4.25                 | 1766.23        | 1764     |
| <b>W3</b>             | RR <b>W</b> RRRRRRRRR | 4.27                 | 1766.23        | 1764     |
| <b>W4</b>             | RRR <b>W</b> RRRRRRRR | 4.33                 | 1766.23        | 1764     |
| <b>W5</b>             | RRRR <b>W</b> RRRRRRR | 4.36                 | 1766.23        | 1764     |
| <b>W6</b>             | RRRRR <b>W</b> RRRRRR | 4.34                 | 1766.23        | 1764     |
| <b>W7</b>             | RRRRRR <b>W</b> RRRRR | 4.38                 | 1766.23        | 1764     |
| <b>W8</b>             | RRRRRRR <b>W</b> RRRR | 4.36                 | 1766.23        | 1764     |
| <b>W9</b>             | RRRRRRRR <b>W</b> RRR | 4.37                 | 1766.23        | 1764     |
| <b>W10</b>            | RRRRRRRRR <b>W</b> R  | 4.31                 | 1766.23        | 1764     |
| <b>W11</b>            | RRRRRRRRRR <b>W</b>   | 4.33                 | 1766.23        | 1764     |

**Table S5.** Two way ANOVA and Tukey's multiple comparison test for the SYTOX green assay. The upper triangular matrix highlighted in yellow corresponds to *S. aureus* and the lower to *E. coli*. Significance level: \*\*\*\* P < 0.0001. \*\*\* P < 0.003; \*\* P < 0.005; \* P < 0.01. ns: not significant.

|                |     | <i>S. aureus</i> |      |      |      |      |      |      |      |      |      |      |      |
|----------------|-----|------------------|------|------|------|------|------|------|------|------|------|------|------|
|                |     | C-               | C+   | R11  | A3   | A10  | P1   | P6   | P7   | L2   | L3   | L9   | W7   |
| <i>E. coli</i> | C-  |                  | **** | **** | **** | **** | **** | **** | **** | **** | **** | **** | **** |
|                | C+  | ****             |      | **** | **** | **** | **** | **** | **** | **** | **** | **** | **** |
|                | R11 | ****             | **** |      | ns   | **** | **** | **** | *    | ns   | ns   | ns   | **** |
|                | A3  | ****             | **** | **** |      | **** | **** | **** | ns   | ns   | ns   | ns   | **** |
|                | A10 | ****             | **** | ns   | **** |      | ns   | ns   | **** | **** | **** | **** | ns   |
|                | P1  | ****             | **** | **** | **** | **** |      | ns   | **** | **** | **** | **** | *    |
|                | P6  | ****             | **** | ns   | **** | ns   | **** |      | ***  | **** | **** | **** | **** |
|                | P7  | ****             | **** | ns   | **** | ns   | **** | ns   |      | ns   | *    | **   | **** |
|                | L2  | ****             | **** | **** | **** | **** | ns   | **** | **** |      | ns   | ns   | **** |
|                | L3  | ****             | **** | **** | **** | **** | **** | **** | **** | **** |      | ns   | **** |
|                | L9  | ****             | **** | **** | **** | **** | ns   | **** | **** | **** | **** |      | **** |
|                | W7  | ****             | **** | **** | ns   | **** | **** | **** | **** | **   | *    | **** |      |

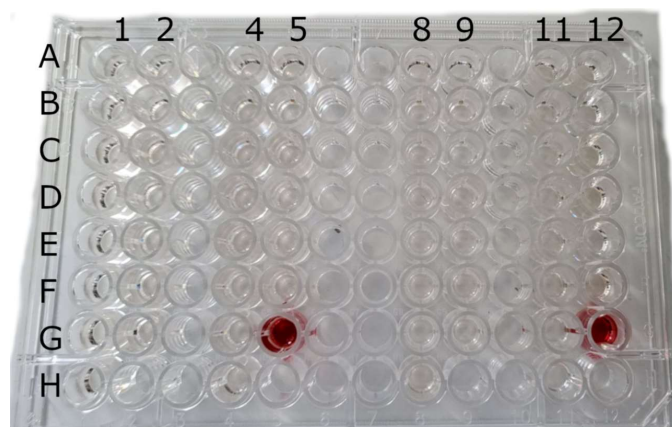

| Line | 5 $\mu$ M |                   | 50 $\mu$ M |                   |
|------|-----------|-------------------|------------|-------------------|
|      | 1, 4      | 2, 5              | 8, 9       | 11, 12            |
| A    | R11       | L7                | R11        | L7                |
| B    | A3        | L9                | A3         | L9                |
| C    | A10       | L6                | A10        | L6                |
| D    | P1        | L9                | P1         | L9                |
| E    | P6        |                   | P6         |                   |
| F    | P7        | <i>Bothrops</i> * | P7         | <i>Bothrops</i> * |
| G    | L2        | 0%/100%*<br>*     | L2         | 0%/100%*<br>*     |
| H    | L3        |                   | L3         |                   |

\**Bothrops* corresponds to the peptide used as control in Sytox and MBC assays.

\*\*0% correspond to PBS 1X in lines 2 and 11, and 100% correspond to triton X-100 in lines 5 and 12.

**Figure S1.** 96 well plate for the hemolysis assay. Contents of the plate are indicated in the table below the picture.

**Table S6.** Secondary structure analysis for Ala and Pro scanning performed by CDPro-CONTIN with the SP37A database. Structural classes: H: helix; S: strand; Turn; PP2: Polyproline II. Unrd: Unordered or random. **PPII<sub>(Eq2)</sub>**: percentage of Polyproline II calculated according to equation 2.

| 2mM PBS           |     |    |    |    |    |    |    |    |    |    |     |     |    |    |    |    |    |    |    |    |    |     |     |
|-------------------|-----|----|----|----|----|----|----|----|----|----|-----|-----|----|----|----|----|----|----|----|----|----|-----|-----|
| Class             | R11 | A1 | A2 | A3 | A4 | A5 | A6 | A7 | A8 | A9 | A10 | A11 | P1 | P2 | P3 | P4 | P5 | P6 | P7 | P8 | P9 | P10 | P11 |
| H                 | 4   | 4  | 4  | 5  | 3  | 5  | 6  | 5  | 3  | 2  | 4   | 6   | 2  | 0  | 5  | 1  | 3  | 2  | 4  | 1  | 30 | 2   | 5   |
| S                 | 23  | 30 | 23 | 32 | 28 | 25 | 27 | 25 | 22 | 26 | 22  | 28  | 27 | 26 | 22 | 26 | 25 | 23 | 24 | 28 | 0  | 24  | 24  |
| Turn              | 15  | 14 | 12 | 13 | 11 | 14 | 12 | 14 | 12 | 12 | 12  | 10  | 13 | 12 | 13 | 13 | 12 | 15 | 12 | 13 | 20 | 13  | 13  |
| PPII              | 12  | 13 | 12 | 13 | 13 | 11 | 13 | 12 | 11 | 11 | 12  | 11  | 12 | 12 | 11 | 13 | 11 | 16 | 11 | 12 | 7  | 12  | 9   |
| Unrd              | 46  | 40 | 49 | 37 | 45 | 44 | 42 | 45 | 52 | 50 | 52  | 45  | 47 | 50 | 50 | 47 | 50 | 44 | 49 | 45 | 43 | 49  | 50  |
| PPII(Eq2)         | 56  | 48 | 47 | 49 | 46 | 48 | 47 | 51 | 46 | 46 | 47  | 49  | 48 | 45 | 45 | 49 | 44 | 57 | 44 | 40 | 41 | 44  | 49  |
| 30% TFE           |     |    |    |    |    |    |    |    |    |    |     |     |    |    |    |    |    |    |    |    |    |     |     |
| Class             | R11 | A1 | A2 | A3 | A4 | A5 | A6 | A7 | A8 | A9 | A10 | A11 | P1 | P2 | P3 | P4 | P5 | P6 | P7 | P8 | P9 | P10 | P11 |
| H                 | 6   | 2  | 3  | 4  | 5  | 1  | 3  | 3  | 2  | 2  | 3   | 2   | 4  | 2  | 6  | 5  | 7  | 5  | 7  | 1  | 8  | 3   | 7   |
| S                 | 21  | 28 | 25 | 32 | 31 | 27 | 30 | 27 | 27 | 27 | 26  | 27  | 20 | 28 | 24 | 22 | 23 | 20 | 23 | 33 | 19 | 27  | 26  |
| Turn              | 12  | 12 | 12 | 12 | 13 | 12 | 13 | 12 | 12 | 12 | 12  | 13  | 14 | 13 | 12 | 14 | 12 | 14 | 12 | 12 | 13 | 13  | 13  |
| PPII              | 12  | 12 | 12 | 13 | 13 | 13 | 12 | 12 | 12 | 12 | 12  | 12  | 12 | 13 | 12 | 12 | 11 | 12 | 11 | 15 | 10 | 13  | 11  |
| Unrd              | 49  | 46 | 48 | 40 | 39 | 48 | 42 | 47 | 47 | 47 | 47  | 46  | 50 | 45 | 46 | 47 | 47 | 48 | 46 | 39 | 51 | 45  | 44  |
| PPII(Eq2)         | 46  | 44 | 45 | 47 | 46 | 47 | 43 | 43 | 45 | 44 | 46  | 45  | 35 | 44 | 37 | 29 | 29 | 33 | 31 | 49 | 27 | 42  | 34  |
| E. coli membranes |     |    |    |    |    |    |    |    |    |    |     |     |    |    |    |    |    |    |    |    |    |     |     |
| Class             | R11 | A1 | A2 | A3 | A4 | A5 | A6 | A7 | A8 | A9 | A10 | A11 | P1 | P2 | P3 | P4 | P5 | P6 | P7 | P8 | P9 | P10 | P11 |
| H                 | 3   | 8  | 4  | 1  | 1  | 1  | 6  | 4  | 3  | 6  | 5   | 5   | 1  | 1  | 3  | 1  | 3  | 2  | 2  | 1  | 6  | 1   | 1   |
| S                 | 24  | 32 | 24 | 27 | 28 | 32 | 24 | 25 | 26 | 34 | 31  | 30  | 24 | 25 | 24 | 25 | 23 | 23 | 24 | 26 | 17 | 24  | 21  |
| Turn              | 11  | 12 | 15 | 11 | 10 | 11 | 14 | 15 | 12 | 10 | 11  | 11  | 11 | 13 | 14 | 13 | 12 | 13 | 12 | 13 | 13 | 13  | 12  |
| PP2               | 13  | 15 | 13 | 13 | 14 | 12 | 12 | 12 | 10 | 14 | 9   | 10  | 13 | 14 | 12 | 13 | 13 | 12 | 13 | 13 | 13 | 14  | 13  |
| Unrd              | 49  | 33 | 44 | 48 | 47 | 44 | 44 | 44 | 49 | 35 | 44  | 44  | 51 | 47 | 47 | 49 | 50 | 50 | 49 | 47 | 52 | 49  | 53  |
| PPII(Eq2)         | 52  | 50 | 61 | 51 | 58 | 50 | 54 | 57 | 49 | 50 | 58  | 49  | 54 | 56 | 54 | 49 | 45 | 43 | 44 | 50 | 41 | 54  | 50  |
| DMPG              |     |    |    |    |    |    |    |    |    |    |     |     |    |    |    |    |    |    |    |    |    |     |     |
| Class             | R11 | A1 | A2 | A3 | A4 | A5 | A6 | A7 | A8 | A9 | A10 | A11 | P1 | P2 | P3 | P4 | P5 | P6 | P7 | P8 | P9 | P10 | P11 |
| H                 | 0   | 6  | 3  | 1  | 1  | 1  | 0  | 4  | 3  | 5  | 6   | 7   | 1  | 1  | 1  | 2  | 3  | 4  | 3  | 1  | 5  | 3   | 3   |
| S                 | 21  | 33 | 22 | 28 | 29 | 29 | 29 | 28 | 25 | 31 | 22  | 27  | 22 | 25 | 24 | 26 | 26 | 23 | 23 | 27 | 16 | 21  | 24  |
| Turn              | 12  | 12 | 11 | 14 | 11 | 11 | 11 | 11 | 11 | 12 | 14  | 13  | 12 | 12 | 12 | 13 | 12 | 13 | 13 | 12 | 12 | 11  | 13  |
| PP2               | 16  | 15 | 12 | 12 | 13 | 13 | 13 | 13 | 12 | 14 | 12  | 12  | 12 | 13 | 13 | 12 | 11 | 12 | 12 | 13 | 12 | 12  | 11  |
| Unrd              | 52  | 33 | 52 | 48 | 46 | 49 | 47 | 45 | 49 | 38 | 45  | 42  | 52 | 50 | 50 | 47 | 48 | 49 | 50 | 47 | 55 | 53  | 50  |
| PPII(Eq2)         | 71  | 45 | 46 | 45 | 51 | 51 | 49 | 47 | 47 | 47 | 57  | 50  | 48 | 49 | 49 | 41 | 38 | 36 | 42 | 49 | 43 | 48  | 52  |

**Table S7.** Secondary structure analysis for Ala and Pro scanning performed by CDPro-CONTIN with the SP37A database. Structural classes: H: helix; S: strand; Turn; PPII: Polypoline II. Unrd: Unordered or random. **PPII<sub>(Eq2)</sub>**: percentage of Polypoline II calculated according to equation 2.

| PBS                   |     |    |    |    |    |    |    |    |    |    |     |     |    |    |    |    |    |    |    |    |    |     |     |
|-----------------------|-----|----|----|----|----|----|----|----|----|----|-----|-----|----|----|----|----|----|----|----|----|----|-----|-----|
| Class                 | R11 | L1 | L2 | L3 | L4 | L5 | L6 | L7 | L8 | L9 | L10 | L11 | W1 | W2 | W3 | W4 | W5 | W6 | W7 | W8 | W9 | W10 | W11 |
| H                     | 4   | 0  | 5  | 0  | 3  | 0  | 4  | 0  | 0  | 3  | 0   | 2   | 0  | 6  | 5  | 0  | 0  | 1  | 1  | 0  | 0  | 2   | 1   |
| S                     | 23  | 41 | 27 | 31 | 22 | 18 | 25 | 19 | 46 | 24 | 20  | 15  | 25 | 18 | 20 | 58 | 23 | 30 | 21 | 35 | 59 | 8   | 25  |
| Turn                  | 15  | 13 | 16 | 17 | 12 | 13 | 13 | 13 | 11 | 11 | 12  | 14  | 11 | 15 | 17 | 10 | 15 | 14 | 15 | 14 | 12 | 9   | 18  |
| PP2                   | 12  | 18 | 12 | 20 | 13 | 16 | 12 | 17 | 16 | 13 | 18  | 15  | 14 | 9  | 10 | 18 | 15 | 13 | 16 | 18 | 19 | 10  | 18  |
| Unrd                  | 46  | 29 | 40 | 32 | 49 | 52 | 46 | 52 | 28 | 50 | 51  | 53  | 51 | 53 | 48 | 14 | 47 | 42 | 47 | 34 | 10 | 72  | 38  |
| PPII <sub>(Eq2)</sub> | 56  | 75 | 71 | 73 | 69 | 75 | 61 | 64 | 65 | 54 | 73  | 70  | 49 | 56 | 51 | 62 | 50 | 47 | 59 | 53 | 49 | 49  | 71  |
| 30 % TFE              |     |    |    |    |    |    |    |    |    |    |     |     |    |    |    |    |    |    |    |    |    |     |     |
| Class                 | R11 | L1 | L2 | L3 | L4 | L5 | L6 | L7 | L8 | L9 | L10 | L11 | W1 | W2 | W3 | W4 | W5 | W6 | W7 | W8 | W9 | W10 | W11 |
| H                     | 6   | 4  | 1  | 3  | 1  | 6  | 1  | 7  | 8  | 1  | 7   | 6   | 1  | 4  | 1  | 1  | 1  | 2  | 5  | 3  | 1  | 2   | 4   |
| S                     | 21  | 36 | 29 | 26 | 28 | 36 | 27 | 28 | 26 | 27 | 23  | 23  | 27 | 28 | 27 | 29 | 28 | 29 | 32 | 29 | 29 | 25  | 28  |
| Turn                  | 12  | 16 | 11 | 16 | 12 | 11 | 12 | 14 | 14 | 14 | 16  | 16  | 12 | 15 | 12 | 13 | 12 | 14 | 17 | 14 | 13 | 14  | 16  |
| PP2                   | 12  | 15 | 14 | 11 | 14 | 17 | 13 | 12 | 12 | 13 | 12  | 12  | 14 | 12 | 14 | 14 | 14 | 14 | 14 | 13 | 13 | 13  | 14  |
| Unrd                  | 49  | 31 | 45 | 44 | 46 | 30 | 47 | 40 | 40 | 45 | 43  | 43  | 46 | 42 | 46 | 43 | 46 | 41 | 33 | 41 | 44 | 46  | 38  |
| PPII <sub>(Eq2)</sub> | 46  | 54 | 58 | 58 | 59 | 56 | 54 | 57 | 51 | 55 | 61  | 58  | 61 | 56 | 57 | 58 | 55 | 53 | 51 | 46 | 50 | 49  | 50  |
| E. coli membranes     |     |    |    |    |    |    |    |    |    |    |     |     |    |    |    |    |    |    |    |    |    |     |     |
| Class                 | R11 | L1 | L2 | L3 | L4 | L5 | L6 | L7 | L8 | L9 | L10 | L11 | W1 | W2 | W3 | W4 | W5 | W6 | W7 | W8 | W9 | W10 | W11 |
| H                     | 3   | 0  | 0  | 0  | 0  | 0  | 0  | 0  | 0  | 1  | 0   | 6   | 1  | 0  | 0  | 1  | 0  | 5  | 0  | 6  | 5  | 5   | 1   |
| S                     | 24  | 16 | 26 | 17 | 21 | 20 | 22 | 15 | 23 | 24 | 18  | 17  | 20 | 28 | 22 | 30 | 24 | 17 | 19 | 11 | 21 | 11  | 14  |
| Turn                  | 11  | 11 | 11 | 11 | 11 | 11 | 11 | 11 | 12 | 12 | 10  | 13  | 10 | 14 | 12 | 14 | 12 | 16 | 15 | 16 | 16 | 16  | 12  |
| PP2                   | 13  | 16 | 16 | 14 | 15 | 14 | 14 | 15 | 14 | 13 | 17  | 14  | 13 | 15 | 14 | 14 | 14 | 14 | 15 | 14 | 12 | 15  | 13  |
| Unrd                  | 49  | 57 | 48 | 57 | 52 | 55 | 53 | 59 | 52 | 51 | 55  | 51  | 56 | 43 | 51 | 41 | 50 | 84 | 52 | 53 | 46 | 53  | 60  |
| PPII <sub>(Eq2)</sub> | 52  | 74 | 73 | 71 | 71 | 64 | 62 | 69 | 62 | 54 | 79  | 71  | 56 | 64 | 58 | 50 | 58 | 45 | 46 | 44 | 42 | 46  | 48  |
| DMPG                  |     |    |    |    |    |    |    |    |    |    |     |     |    |    |    |    |    |    |    |    |    |     |     |
| Class                 | R11 | L1 | L2 | L3 | L4 | L5 | L6 | L7 | L8 | L9 | L10 | L11 | W1 | W2 | W3 | W4 | W5 | W6 | W7 | W8 | W9 | W10 | W11 |
| H                     | 0   | 0  | 0  | 0  | 0  | 0  | 0  | 1  | 0  | 0  | 6   | 0   | 3  | 7  | 6  | 36 | 47 | 19 | 16 | 0  | 18 | 0   | 0   |
| S                     | 21  | 15 | 22 | 19 | 23 | 17 | 19 | 13 | 20 | 23 | 12  | 12  | 25 | 23 | 17 | 0  | 0  | 8  | 2  | 55 | 10 | 38  | 45  |
| Turn                  | 12  | 11 | 10 | 11 | 10 | 11 | 13 | 12 | 10 | 11 | 15  | 11  | 15 | 15 | 15 | 19 | 53 | 26 | 19 | 10 | 22 | 12  | 11  |
| PP2                   | 16  | 16 | 16 | 15 | 16 | 15 | 15 | 15 | 14 | 14 | 14  | 17  | 12 | 10 | 10 | 45 | 0  | 10 | 8  | 20 | 9  | 20  | 14  |
| Unrd                  | 52  | 58 | 52 | 56 | 51 | 57 | 53 | 60 | 56 | 52 | 53  | 60  | 46 | 46 | 53 | 0  | 0  | 38 | 55 | 16 | 41 | 30  | 29  |
| PPII <sub>(Eq2)</sub> | 71  | 80 | 79 | 73 | 76 | 73 | 68 | 71 | 65 | 55 | 83  | 89  | 44 | 47 | 36 | 51 | 57 | 51 | 35 | 64 | 46 | 68  | 55  |
